# Supplementary material
Source: MDPI journal article supplement (https://www.mdpi.com/2073-8994/15/1/197)
Supplement: s1 [file s1]

Table S1: Excitation energies derived from all-electron numerical SCF calculations for the states averaged over nonrelativistic configurations of the  $\text{Th}^+$  cation with DCB Hamiltonian and accounting for the finite nuclear size and QED effects. The contributions from various effects are the differences from the results of the all-electron numerical SCF calculations without the QED effects, with the point nucleus, or without Breit/Gaunt interactions. Errors of the GRPPs are estimated as differences between the results of the all-electron calculations and the calculations with corresponding GRPP versions. All data are in  $\text{cm}^{-1}$ .

|                               | Exc. energy  | Contributions from |       |       |       |         | Errors of |         |
|-------------------------------|--------------|--------------------|-------|-------|-------|---------|-----------|---------|
|                               | DCB+QED      | Finite             |       |       |       |         | Full      | Valence |
| $\dots 6d^1 7s^2 \rightarrow$ | Finite nucl. | QED                | nucl. | Breit | Gaunt | Retard. | GRPP      | GRPP    |
| $\dots 6d^2 7s^1$             | 1836         | -190               | -117  | -141  | -154  | 13      | -1        | -42     |
| $\dots 6d^3$                  | 10060        | -357               | -220  | -268  | -292  | 25      | -1        | -76     |
| $\dots 6d^1 7s^1 7p^1$        | 25623        | -124               | -90   | 4     | 13    | -9      | 3         | -4      |
| $\dots 6d^2 7p^1$             | 30182        | -313               | -205  | -148  | -154  | 6       | 2         | -48     |
| $\dots 5f^1 7s^2$             | 6231         | -156               | -69   | -741  | -869  | 128     | -35       | -556    |
| $\dots 5f^1 6d^1 7s^1$        | 11266        | -324               | -173  | -854  | -991  | 137     | -36       | -577    |
| $\dots 5f^1 6d^2$             | 22205        | -471               | -264  | -951  | -1096 | 145     | -36       | -592    |
| $\dots 5f^1 7s^1 7p^1$        | 29767        | -266               | -149  | -739  | -859  | 120     | -33       | -563    |
| $\dots 5f^1 6d^1 7p^1$        | 37469        | -435               | -252  | -864  | -995  | 131     | -34       | -587    |
| $\dots 5f^2 7s^1$             | 37289        | -429               | -217  | -1399 | -1632 | 233     | -65       | -953    |
| $\dots 5f^2 6d^1$             | 49949        | -551               | -295  | -1447 | -1680 | 233     | -63       | -935    |
| $\dots 5f^2 7p^1$             | 61398        | -529               | -289  | -1423 | -1653 | 230     | -64       | -974    |

Table S2: SCF excitation energies for the  $U^{2+}$  cation. See the caption of Table S1

|                               | Exc. energy             | Contributions from |                 |       |       |         | Errors of    |                 |
|-------------------------------|-------------------------|--------------------|-----------------|-------|-------|---------|--------------|-----------------|
|                               | DCB+QED<br>Finite nucl. | QED                | Finite<br>nucl. | Breit | Gaunt | Retard. | Full<br>GRPP | Valence<br>GRPP |
| $\dots 5f^3 7s^1 \rightarrow$ |                         |                    |                 |       |       |         |              |                 |
| $\dots 5f^3 6d^1$             | 3623                    | -204               | 146             | -120  | -128  | 8       | 1            | -7              |
| $\dots 5f^3 7p^1$             | 35916                   | -149               | 125             | -6    | 3     | -9      | 2            | -11             |
| $\dots 5f^4$                  | 11129                   | -319               | 197             | -762  | -884  | 122     | -47          | -439            |
| $\dots 5f^2 6d^1 7s^1$        | 15741                   | 158                | -75             | 797   | 936   | -139    | 55           | 578             |
| $\dots 5f^2 6d^2$             | 15722                   | -68                | 86              | 652   | 780   | -128    | 56           | 555             |
| $\dots 5f^2 7s^2$             | 23143                   | 408                | -253            | 952   | 1103  | -151    | 55           | 606             |
| $\dots 5f^2 6d^1 7p^1$        | 54002                   | -6                 | 61              | 793   | 942   | -149    | 58           | 569             |
| $\dots 5f^2 7s^1 7p^1$        | 58022                   | 242                | -113            | 959   | 1122  | -163    | 57           | 598             |
| $\dots 5f^1 6d^3$             | 49267                   | 85                 | 18              | 1534  | 1817  | -283    | 117          | 1242            |
| $\dots 5f^1 6d^2 7s^1$        | 53343                   | 332                | -157            | 1699  | 1995  | -296    | 115          | 1277            |
| $\dots 5f^1 6d^1 7s^2$        | 65121                   | 603                | -350            | 1875  | 2185  | -310    | 114          | 1318            |
| $\dots 5f^1 6d^2 7p^1$        | 93849                   | 153                | -9              | 1694  | 2001  | -307    | 119          | 1269            |
| $\dots 5f^1 6d^1 7s^1 7p^1$   | 102166                  | 421                | -197            | 1881  | 2204  | -323    | 117          | 1311            |
| $\dots 5f^1 7s^2 7p^1$        | 118117                  | 712                | -401            | 2078  | 2417  | -339    | 115          | 1360            |

Table S3: Basis set for Th (adapted for all-electron calculations)

| s             | p             | d             | f             |             |             |
|---------------|---------------|---------------|---------------|-------------|-------------|
| 5.7372472E+07 | 7.2974232E+07 | 5.3945587E+05 | 1.9495163E+03 |             |             |
| 1.5274857E+07 | 2.6222425E+07 | 1.2481597E+05 | 6.5321253E+02 |             |             |
| 5.2287218E+06 | 9.6396368E+06 | 3.9067151E+04 | 2.7657880E+02 |             |             |
| 1.9911461E+06 | 3.7180139E+06 | 1.4490467E+04 | 1.3221675E+02 |             |             |
| 8.3294306E+05 | 1.4914786E+06 | 6.0646913E+03 | 6.7322922E+01 |             |             |
| 3.7024359E+05 | 6.1958412E+05 | 2.7754714E+03 | 3.5748720E+01 |             |             |
| 1.7401271E+05 | 2.6538254E+05 | 1.3603469E+03 | 1.9282595E+01 |             |             |
| 8.5351033E+04 | 1.1694933E+05 | 7.0308463E+02 | 1.0420910E+01 |             |             |
| 4.3522358E+04 | 5.2967927E+04 | 3.7817822E+02 | 5.5494732E+00 |             |             |
| 2.2897565E+04 | 2.4647085E+04 | 2.1008995E+02 | 2.8546293E+00 |             |             |
| 1.2365131E+04 | 1.1793294E+04 | 1.1944362E+02 | 1.3616238E+00 |             |             |
| 6.8123949E+03 | 5.8112196E+03 | 6.9167371E+01 | 6.0962858E-01 |             |             |
| 3.8216976E+03 | 2.9520515E+03 | 4.0526574E+01 | 2.5283879E-01 |             |             |
| 2.1876513E+03 | 1.5459858E+03 | 2.3754294E+01 | 9.1321054E-02 |             |             |
| 1.2845154E+03 | 8.3271616E+02 | 1.3812695E+01 | 0.050404710   |             |             |
| 7.7514556E+02 | 4.5979539E+02 | 8.0361154E+00 |               |             |             |
| 4.7794411E+02 | 2.5964223E+02 | 4.6268519E+00 |               |             |             |
| 3.0108104E+02 | 1.4905823E+02 | 2.5969052E+00 |               |             |             |
| 1.9472481E+02 | 8.6644660E+01 | 1.4346916E+00 |               |             |             |
| 1.2576401E+02 | 5.1449971E+01 | 7.6657941E-01 |               |             |             |
| 7.9566905E+01 | 3.0555992E+01 | 3.7837468E-01 |               |             |             |
| 4.9492239E+01 | 1.7980889E+01 | 1.8023811E-01 |               |             |             |
| 3.0215779E+01 | 1.0714043E+01 | 8.2104366E-02 |               |             |             |
| 1.8217418E+01 | 6.3449373E+00 | 3.5428853E-02 |               |             |             |
| 1.1330243E+01 | 3.6913390E+00 |               |               |             |             |
| 7.0264506E+00 | 2.1349318E+00 |               |               |             |             |
| 4.3179378E+00 | 1.2173577E+00 |               |               |             |             |
| 2.5703476E+00 | 6.7609571E-01 |               |               |             |             |
| 1.5336087E+00 | 3.6904041E-01 |               |               |             |             |
| 9.2576591E-01 | 1.9816814E-01 |               |               |             |             |
| 5.3273696E-01 | 9.8623375E-02 |               |               |             |             |
| 3.0732299E-01 | 4.9499235E-02 |               |               |             |             |
| 1.7263001E-01 | 2.4523811E-02 |               |               |             |             |
| 1.1178547E-01 | 1.2048163E-02 |               |               |             |             |
| 6.2052232E-02 |               |               |               |             |             |
| 3.3255867E-02 |               |               |               |             |             |
| 1.7363052E-02 |               |               |               |             |             |
|               |               |               |               |             |             |
| g             |               |               |               |             |             |
| 4.051400      | -0.39050416   | -0.61954067   | -0.96399632   | 1.62489561  | 1.83082198  |
| 2.626800      | -0.14497714   | -0.12104339   | 0.53736468    | -1.90617971 | -3.03581936 |
| 1.253372      | -0.43643468   | 0.06754934    | 0.60776808    | 0.17506986  | 2.32246997  |
| 0.598043      | -0.22671258   | 0.57762149    | -0.03877817   | 0.78677621  | -1.23439570 |
| 0.285355      | -0.11743458   | 0.18337172    | -0.56850726   | -0.43180841 | -0.04663287 |
| 0.125406      | -0.01366788   | 0.10101326    | -0.20312263   | -0.38775773 | 0.49713826  |
| 0.070000      | -0.00788183   | -0.00473646   | -0.05147319   | -0.07013222 | 0.11908926  |
|               |               |               |               |             |             |
| h             |               |               |               |             |             |
| 3.355101      | 0.60387854    | 0.86268421    | 0.97574163    | 0.68874430  |             |
| 1.717548      | 0.20048876    | -0.31035087   | -1.43221801   | -1.56791538 |             |
| 0.829135      | 0.40376963    | -0.41481115   | 0.37786594    | 1.73039803  |             |
| 0.400260      | 0.04311932    | -0.35643139   | 0.38817295    | -0.86490159 |             |
| 0.193223      | 0.05181809    | -0.01801598   | 0.24106505    | -0.24693901 |             |
| 0.093277      | -0.00896431   | -0.02460562   | 0.01017355    | -0.16069223 |             |
|               |               |               |               |             |             |
| i             |               |               |               |             |             |
| 4.170400      | -0.60702568   | -0.78168583   | -0.88597888   |             |             |
| 2.085200      | -0.27775539   | 0.25844373    | 1.33775876    |             |             |
| 1.042600      | -0.32522282   | 0.48122880    | -0.40385773   |             |             |
| 0.521300      | -0.05639583   | 0.31526697    | -0.40950817   |             |             |
| 0.260650      | -0.02799659   | 0.03433980    | -0.18926618   |             |             |

Table S4: Basis set for Th (adapted for GRPP calculations)

| s           | p           | d           | f           |             |             |
|-------------|-------------|-------------|-------------|-------------|-------------|
| 160.0719800 | 82.16746000 | 522.5137000 | 1748.457720 |             |             |
| 87.56533000 | 65.73397000 | 134.0478700 | 613.2081400 |             |             |
| 67.66944000 | 52.58717000 | 46.44729000 | 264.9269100 |             |             |
| 45.23225000 | 30.55599200 | 37.15783000 | 129.3075800 |             |             |
| 30.21577900 | 17.98088900 | 23.75429400 | 67.04702000 |             |             |
| 18.21741800 | 10.71404300 | 13.81269500 | 35.74872000 |             |             |
| 11.33024300 | 6.344937300 | 8.036115400 | 19.28259500 |             |             |
| 7.026450600 | 3.691339000 | 4.626851900 | 10.42091000 |             |             |
| 4.317937800 | 2.134931800 | 2.596905200 | 5.549473200 |             |             |
| 2.570347600 | 1.217357700 | 1.434691600 | 2.854629300 |             |             |
| 1.533608700 | 0.676095710 | 0.766579410 | 1.361623800 |             |             |
| 0.925765910 | 0.369040410 | 0.378374680 | 0.609628580 |             |             |
| 0.532736960 | 0.198168140 | 0.180238110 | 0.252838790 |             |             |
| 0.307322990 | 0.098623375 | 0.082104366 | 0.091321054 |             |             |
| 0.172630010 | 0.049499235 | 0.035428853 | 0.050404710 |             |             |
| 0.111785470 | 0.024523811 |             |             |             |             |
| 0.062052232 | 0.012048163 |             |             |             |             |
| 0.033255867 |             |             |             |             |             |
| 0.017363052 |             |             |             |             |             |
| g           |             |             |             |             |             |
| 4.051400    | -0.39050416 | -0.61954067 | -0.96399632 | 1.62489561  | 1.83082198  |
| 2.626800    | -0.14497714 | -0.12104339 | 0.53736468  | -1.90617971 | -3.03581936 |
| 1.253372    | -0.43643468 | 0.06754934  | 0.60776808  | 0.17506986  | 2.32246997  |
| 0.598043    | -0.22671258 | 0.57762149  | -0.03877817 | 0.78677621  | -1.23439570 |
| 0.285355    | -0.11743458 | 0.18337172  | -0.56850726 | -0.43180841 | -0.04663287 |
| 0.125406    | -0.01366788 | 0.10101326  | -0.20312263 | -0.38775773 | 0.49713826  |
| 0.070000    | -0.00788183 | -0.00473646 | -0.05147319 | -0.07013222 | 0.11908926  |
| h           |             |             |             |             |             |
| 3.355101    | 0.60387854  | 0.86268421  | 0.97574163  | 0.68874430  |             |
| 1.717548    | 0.20048876  | -0.31035087 | -1.43221801 | -1.56791538 |             |
| 0.829135    | 0.40376963  | -0.41481115 | 0.37786594  | 1.73039803  |             |
| 0.400260    | 0.04311932  | -0.35643139 | 0.38817295  | -0.86490159 |             |
| 0.193223    | 0.05181809  | -0.01801598 | 0.24106505  | -0.24693901 |             |
| 0.093277    | -0.00896431 | -0.02460562 | 0.01017355  | -0.16069223 |             |
| i           |             |             |             |             |             |
| 4.170400    | -0.60702568 | -0.78168583 | -0.88597888 |             |             |
| 2.085200    | -0.27775539 | 0.25844373  | 1.33775876  |             |             |
| 1.042600    | -0.32522282 | 0.48122880  | -0.40385773 |             |             |
| 0.521300    | -0.05639583 | 0.31526697  | -0.40950817 |             |             |
| 0.260650    | -0.02799659 | 0.03433980  | -0.18926618 |             |             |

Table S5: Basis set for U (adapted for all-electron calculations)

| s                 | p                 | d               | f             |             |             |
|-------------------|-------------------|-----------------|---------------|-------------|-------------|
| 56697466.00000000 | 78339499.00000000 | 533180.91000000 | 1163.36020000 |             |             |
| 15093688.00000000 | 29808990.00000000 | 123237.63000000 | 573.50499000  |             |             |
| 5164101.30000000  | 11443420.00000000 | 38642.36400000  | 285.71163000  |             |             |
| 1964638.80000000  | 4581199.80000000  | 14357.18700000  | 136.47329000  |             |             |
| 820774.81000000   | 1897246.00000000  | 6012.79360000   | 69.43427500   |             |             |
| 364106.97000000   | 809797.42000000   | 2754.36670000   | 36.84465700   |             |             |
| 170668.08000000   | 355067.41000000   | 1351.96790000   | 19.84804900   |             |             |
| 83455.39000000    | 159603.26000000   | 699.79805000    | 10.72168500   |             |             |
| 42423.37700000    | 73450.10100000    | 377.01141000    | 5.70450120    |             |             |
| 22228.77400000    | 34594.86700000    | 209.73941000    | 2.92433440    |             |             |
| 11931.71300000    | 16686.68700000    | 119.30191000    | 1.43960400    |             |             |
| 6539.04200000     | 8256.41640000     | 69.11171400     | 0.67385930    |             |             |
| 3678.23270000     | 4196.77840000     | 40.43241500     | 0.29434970    |             |             |
| 2139.54940000     | 2191.89420000     | 23.65423900     | 0.11323985    |             |             |
| 1288.45330000     | 1174.82830000     | 13.80639900     |               |             |             |
| 792.07718000      | 644.61478000      | 8.06231670      |               |             |             |
| 484.69932000      | 361.41388000      | 4.66375400      |               |             |             |
| 298.00127000      | 206.27034000      | 2.63565040      |               |             |             |
| 186.73959000      | 119.33670000      | 1.45796000      |               |             |             |
| 120.33238000      | 70.14308600       | 0.77481216      |               |             |             |
| 75.85031400       | 41.70407000       | 0.37248472      |               |             |             |
| 49.22312100       | 24.70288000       | 0.17195534      |               |             |             |
| 30.97937000       | 14.49639800       | 0.07613361      |               |             |             |
| 19.33898600       | 8.57587000        |                 |               |             |             |
| 11.90917900       | 4.98086080        |                 |               |             |             |
| 7.28108690        | 2.84040830        |                 |               |             |             |
| 4.52381560        | 1.59903720        |                 |               |             |             |
| 2.69147870        | 0.86476597        |                 |               |             |             |
| 1.62933420        | 0.45724205        |                 |               |             |             |
| 1.02810670        | 0.23893352        |                 |               |             |             |
| 0.60588439        | 0.11879300        |                 |               |             |             |
| 0.35564698        | 0.05700662        |                 |               |             |             |
| 0.20180019        |                   |                 |               |             |             |
| 0.12481356        |                   |                 |               |             |             |
| 0.06383616        |                   |                 |               |             |             |
| g                 |                   |                 |               |             |             |
| 28.78919130       | 0.00068974        | -0.00118120     | -0.00737416   | 0.00494647  | -0.10867784 |
| 14.01320380       | -0.00898795       | -0.05421964     | 0.17284128    | -0.36594951 | -0.33163329 |
| 6.82095857        | 0.07975524        | 0.18134441      | -0.50920321   | 1.20716202  | 1.79274020  |
| 3.32011698        | 0.29993353        | 0.65729862      | -0.50617914   | -0.67702022 | -2.65141994 |
| 1.61607443        | 0.39302861        | 0.04007231      | 1.01049051    | -0.71780643 | 2.66362756  |
| 0.78662787        | 0.34151054        | -0.44799971     | 0.05077223    | 1.59628888  | -2.01035588 |
| 0.38289289        | 0.18576214        | -0.38383279     | -0.74551549   | -1.12509753 | 0.90492997  |
| h                 |                   |                 |               |             |             |
| 14.01320380       | -0.02449353       | -0.07337288     | -0.15906456   | -0.23132505 |             |
| 6.82095857        | 0.10594999        | 0.30442614      | 0.71623431    | 1.22980099  |             |
| 3.32011698        | 0.35765256        | 0.65468802      | 0.09614021    | -1.24473080 |             |
| 1.61607443        | 0.43019757        | -0.18764249     | -0.95514471   | 0.32540556  |             |
| 0.78662787        | 0.31957043        | -0.48353526     | 0.41946211    | 0.73545263  |             |
| 0.38289289        | 0.10197395        | -0.22548628     | 0.48672026    | -0.90679010 |             |
| i                 |                   |                 |               |             |             |
| 6.82095857        | 0.12524957        | -0.37984959     | 0.81416792    |             |             |
| 3.32011698        | 0.42961205        | -0.61109425     | -0.35518331   |             |             |
| 1.61607443        | 0.42313291        | 0.38916709      | -0.73501069   |             |             |
| 0.78662787        | 0.31396902        | 0.50454838      | 0.88347742    |             |             |

Table S6: Basis set for U (adapted for GRPP calculations)

| s              | p             | d             | f             |             |             |
|----------------|---------------|---------------|---------------|-------------|-------------|
| 11931.71300000 | 8256.41640000 | 6012.79360000 | 1163.36020000 |             |             |
| 6539.04200000  | 4196.77840000 | 2754.36670000 | 573.50499000  |             |             |
| 3678.23270000  | 2191.89420000 | 1351.96790000 | 285.71163000  |             |             |
| 2139.54940000  | 1174.82830000 | 699.79805000  | 136.47329000  |             |             |
| 1288.45330000  | 644.61478000  | 377.01141000  | 69.43427500   |             |             |
| 792.07718000   | 361.41388000  | 209.73941000  | 36.84465700   |             |             |
| 484.69932000   | 206.27034000  | 119.30191000  | 19.84804900   |             |             |
| 298.00127000   | 119.33670000  | 69.11171400   | 10.72168500   |             |             |
| 186.73959000   | 70.14308600   | 40.43241500   | 5.70450120    |             |             |
| 120.33238000   | 41.70407000   | 23.65423900   | 2.92433440    |             |             |
| 75.85031400    | 24.70288000   | 13.80639900   | 1.43960400    |             |             |
| 49.22312100    | 14.49639800   | 8.06231670    | 0.67385930    |             |             |
| 30.97937000    | 8.57587000    | 4.66375400    | 0.29434970    |             |             |
| 19.33898600    | 4.98086080    | 2.63565040    | 0.11323985    |             |             |
| 11.90917900    | 2.84040830    | 1.45796000    |               |             |             |
| 7.28108690     | 1.59903720    | 0.77481216    |               |             |             |
| 4.52381560     | 0.86476597    | 0.37248472    |               |             |             |
| 2.69147870     | 0.45724205    | 0.17195534    |               |             |             |
| 1.62933420     | 0.23893352    | 0.07613361    |               |             |             |
| 1.02810670     | 0.11879300    |               |               |             |             |
| 0.60588439     | 0.05700662    |               |               |             |             |
| 0.35564698     |               |               |               |             |             |
| 0.20180019     |               |               |               |             |             |
| 0.12481356     |               |               |               |             |             |
| 0.06383616     |               |               |               |             |             |
| g              |               |               |               |             |             |
| 28.78919130    | 0.00068974    | -0.00118120   | -0.00737416   | 0.00494647  | -0.10867784 |
| 14.01320380    | -0.00898795   | -0.05421964   | 0.17284128    | -0.36594951 | -0.33163329 |
| 6.82095857     | 0.07975524    | 0.18134441    | -0.50920321   | 1.20716202  | 1.79274020  |
| 3.32011698     | 0.29993353    | 0.65729862    | -0.50617914   | -0.67702022 | -2.65141994 |
| 1.61607443     | 0.39302861    | 0.04007231    | 1.01049051    | -0.71780643 | 2.66362756  |
| 0.78662787     | 0.34151054    | -0.44799971   | 0.05077223    | 1.59628888  | -2.01035588 |
| 0.38289289     | 0.18576214    | -0.38383279   | -0.74551549   | -1.12509753 | 0.90492997  |
| h              |               |               |               |             |             |
| 14.01320380    | -0.02449353   | -0.07337288   | -0.15906456   | -0.23132505 |             |
| 6.82095857     | 0.10594999    | 0.30442614    | 0.71623431    | 1.22980099  |             |
| 3.32011698     | 0.35765256    | 0.65468802    | 0.09614021    | -1.24473080 |             |
| 1.61607443     | 0.43019757    | -0.18764249   | -0.95514471   | 0.32540556  |             |
| 0.78662787     | 0.31957043    | -0.48353526   | 0.41946211    | 0.73545263  |             |
| 0.38289289     | 0.10197395    | -0.22548628   | 0.48672026    | -0.90679010 |             |
| i              |               |               |               |             |             |
| 6.82095857     | 0.12524957    | -0.37984959   | 0.81416792    |             |             |
| 3.32011698     | 0.42961205    | -0.61109425   | -0.35518331   |             |             |
| 1.61607443     | 0.42313291    | 0.38916709    | -0.73501069   |             |             |
| 0.78662787     | 0.31396902    | 0.50454838    | 0.88347742    |             |             |
